# Supplementary material
Source: Springer Nature journal article supplement (https://www.springermedizin.de/resource/supplementary/12960_2013_348_MOESM2_ESM.pdf/9569894)

## Is Task Shifting to Nurses and Midwives Taking Place in Your Country?

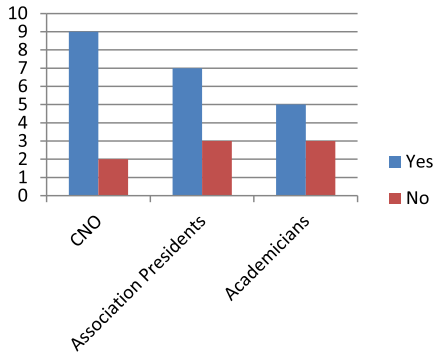

## Are National Practice and Education Regulations Updated to Reflect Task Shifting?

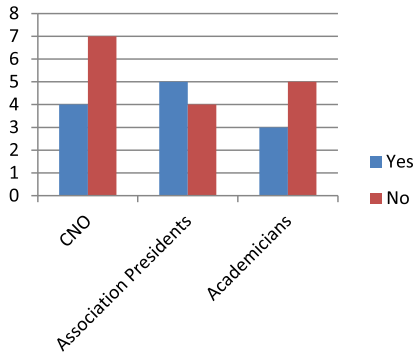

Supplement: MOESM2 [file 9569894]
